# Supplementary material
Source: Springer Nature journal article supplement (https://www.springermedizin.de/resource/supplementary/12931_2013_1501_MOESM2_ESM.pdf/9426338)
Supplement: MOESM2 [file 9426338]

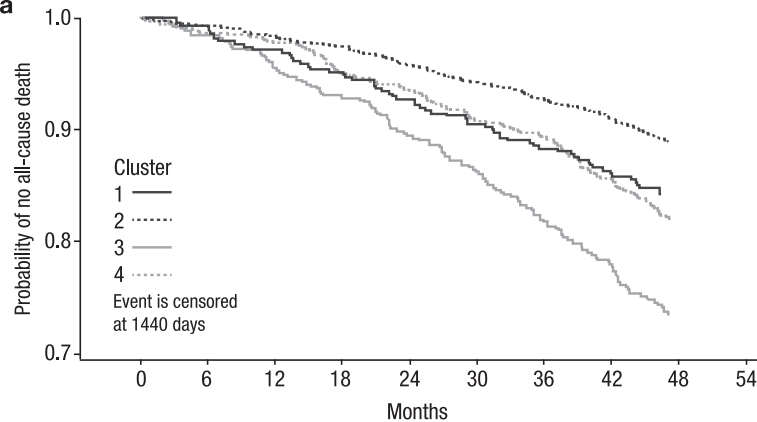

Number at risk

|           |      |      |      |      |      |      |      |      |   |
|-----------|------|------|------|------|------|------|------|------|---|
| Cluster 1 | 410  | 406  | 397  | 387  | 377  | 366  | 357  | 344  | 0 |
| Cluster 2 | 1163 | 1151 | 1137 | 1125 | 1104 | 1085 | 1064 | 1037 | 0 |
| Cluster 3 | 505  | 493  | 477  | 461  | 443  | 427  | 405  | 385  | 0 |
| Cluster 4 | 784  | 769  | 758  | 732  | 720  | 696  | 662  | 647  | 0 |

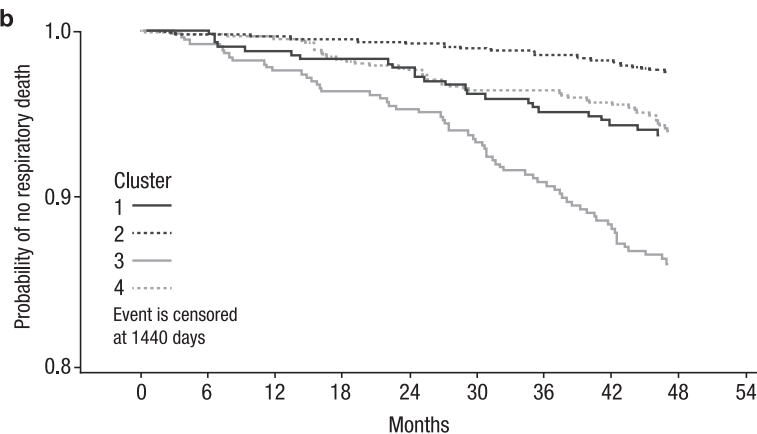

Number at risk

|           |      |      |      |      |      |      |      |      |   |
|-----------|------|------|------|------|------|------|------|------|---|
| Cluster 1 | 410  | 406  | 397  | 387  | 377  | 366  | 357  | 344  | 0 |
| Cluster 2 | 1163 | 1151 | 1137 | 1125 | 1104 | 1085 | 1064 | 1037 | 0 |
| Cluster 3 | 505  | 493  | 477  | 461  | 443  | 427  | 405  | 385  | 0 |
| Cluster 4 | 784  | 769  | 758  | 732  | 720  | 696  | 662  | 647  | 0 |
